# Supplementary material for: Pathobiology of Second-Generation Antihistamines Related to Sleep in Urticaria Patients
Source: MDPI journal article supplement (doi:10.3390/biology11030433), 2022-03-11
Supplement: s1 [file s1]

Table S1: Descriptive characteristics of the sleep and disease parameters comparing both nights

| Item                                        | First night                 | Second night                | p-value  |
|---------------------------------------------|-----------------------------|-----------------------------|----------|
| <b>REM sleep in %</b>                       |                             |                             |          |
| mean $\pm$ SD; range                        | 3.9 $\pm$ 3.2; 0 – 9.2      | 14.3 $\pm$ 6.4; 8,4 – 26    | 0.0002   |
| <b>Slow wave sleep (N3) in %</b>            |                             |                             |          |
| mean $\pm$ SD; range                        | 8.7 $\pm$ 4.7; 0 – 15       | 12.3 $\pm$ 5.1; 4.4 -19.2   | 0.1172   |
| <b>Sleep efficacy in %</b>                  |                             |                             |          |
| mean $\pm$ SD; range                        | 93.1 $\pm$ 3.7; 84.3 – 97.3 | 94.2 $\pm$ 3.9; 84.1 - 98.6 | 0.1202   |
| <b>Sleep latency in min.</b>                |                             |                             |          |
| mean $\pm$ SD; range                        | 10.7 $\pm$ 8.6; 1.5 – 31    | 5.4 $\pm$ 6.1; 0 - 20.4     | 0.0217   |
| <b>Epworth Sleepiness Scale (ESS)</b>       |                             |                             |          |
| mean $\pm$ SD; range                        | 11,5 $\pm$ 4.2; 5.0 – 18    | 10.5 $\pm$ 4.0; 4.0 –18     | 0.0319   |
| <b>Insomnia Severity Index (ISI)</b>        |                             |                             |          |
| mean $\pm$ SD; range                        | 15.2 $\pm$ 4.8; 6.0 – 23    | 12.3 $\pm$ 3.4; 6.0 - 18    | 0.0349   |
| <b>Urticaria Control Test (UCT)</b>         |                             |                             |          |
|                                             |                             |                             | 0.0007   |
| mean $\pm$ SD; range                        | 3.8 $\pm$ 2.7; 0 – 8        | 10.4 $\pm$ 3.8; 5.0 – 16    |          |
| <b>Dermatology Life Quality Index(DLQI)</b> |                             |                             |          |
| mean $\pm$ SD; range                        | 15.0 $\pm$ 2.3; 13.0 – 21   | 6.0 $\pm$ 2.6; 0 – 10       | < 0.0001 |
| <b>Daytime pruritus on NAS</b>              |                             |                             |          |
| mean $\pm$ SD; range                        | 6.0 $\pm$ 2.6; 2.0 – 10     | 2.8 $\pm$ 2.0; 0 – 6        | 0.0120   |
| <b>Nighttime pruritus on NAS</b>            |                             |                             |          |
| mean $\pm$ SD; range                        | 2.9 $\pm$ 2.2; 0 – 6        | 1.9 $\pm$ 1.3; 0 – 4        | 0.1173   |
